# Supplementary material for: Persistent Activation of the Innate Immune Response in Adult Drosophila Following Radiation Exposure During Larval Development
Source: PubMed Central journal article supplement (PMC4632050; doi:10.1534/g3.115.021782), 2015-09-01
Supplement: supp_g3.115.021782_021782SI.pdf [file supp_g3.115.021782_021782SI.pdf]

**Persistent activation of the innate immune response in adult *Drosophila*  
following radiation exposure during larval development**

Lisa J. Sudmeier, Sai-Suma Samudrala, Steven P. Howard and Barry Ganetzky

Medical Scientist Training Program (LS)

Neuroscience Training Program (LS)

Laboratory of Genetics, University of Wisconsin-Madison, 425 Henry Mall Madison, WI 53706  
(L. J. S., S.S., B. G.)

Department of Human Oncology, University of Wisconsin School of Medicine and Public  
Health, 600 Highland Ave. Madison, WI 53792 (S. P. H.)

**Corresponding Author:**

Barry Ganetzky

[ganetzky@wisc.edu](mailto:ganetzky@wisc.edu)

Tel: 608-263-2404

425 Henry Mall

Madison, WI 53706

**DOI: 10.1534/g3.115.021782**

**Table S1. Primers used for qRT-PCR**

| Primers used for qRT-PCR | 5' -> 3'                  |
|--------------------------|---------------------------|
| Rp49 Forward             | GACGCTTCAAGGGACAGTATCTG   |
| Rp49 Reverse             | AAACGCGGTTCTGCATGAG       |
|                          |                           |
| Drosomylin (Drs) Fw      | CGTGAGAACCTTTTCCAATATGATG |
| Drosomylin (Drs) Rv      | TCCCAGGACCACCAGCAT        |
|                          |                           |
| Drosocin (DroA) Fw       | CACCCATGGCAAAAACGC        |
| Drosocin (DroA) Rv       | TGAAGTTCACCATCGTTTTCTG    |
|                          |                           |
| Diptericin (Dipt) Fw     | GCTGCGCAATCGCTTCTACT      |
| Diptericin (Dipt) Rv     | TGGTGGAGTGGGCTTCATG       |
|                          |                           |
| Attacin (AttC) Fw        | TGGGCTACAACAATCATGGA      |
| Attacin (AttC) Rv        | GCGTATGGGTTTTGGTCAGT      |
|                          |                           |
| Cecropin (Cec) Fw        | ACGCGTTGGTCAGCACACT       |
| Cecropin (Cec) Rv        | ACATTGGCGGCTTGTTGAG       |
|                          |                           |
| Metchnikowin (Mtk) Fw    | CGTCACCAGGGACCCATTT       |
| Metchnikowin (Mtk) Rv    | CCGGTCTTGTTGGTTAGGA       |

**Table S2. AMP expression in pupae 5 hours after irradiation**

|       | Drs       | DroA      | Dipt      | AttC      | Cec       | Mtk       |
|-------|-----------|-----------|-----------|-----------|-----------|-----------|
| 10 Gy | 1.5 ± 0.9 | 0.7 ± 0.5 | 0.8 ± 0.6 | 0.7 ± 0.3 | 0.6 ± 0.1 | 1.1 ± 0.8 |
| 20 Gy | 1.3 ± 0.4 | 0.4 ± 0.2 | 0.4 ± 0.1 | 0.6 ± 0.1 | 0.6 ± 0.1 | 0.5 ± 0.2 |
| 30 Gy | 1.2 ± 0.5 | 0.6 ± 0.3 | 0.6 ± 0.3 | 0.9 ± 0.5 | 1.1 ± 0.9 | 0.9 ± 0.6 |
| 40 Gy | 0.8 ± 0.3 | 0.5 ± 0.2 | 1.2 ± 0.4 | 0.8 ± 0.2 | 0.3 ± 0.1 | 1.2 ± 0.5 |

**Table S2. The innate immune response is not activated in pupae 4 hours after irradiating late third instar larvae.** Late third instar larvae were irradiated at the indicated doses and mRNA levels for six different AMPs were quantified in whole pupae 4-4.5 hours after irradiation. Wild-type Canton-S male and female larvae were used for these experiments. Values are given as mean expression of each AMP RNA (2-4 trials each) normalized to mean expression of the corresponding RNA in non-irradiated, age-matched controls (fold induction) ± SEM. Rp49 was used as the reference gene. See Table S1 for primers used.
