# Supplementary material for: Persistent Activation of the Innate Immune Response in Adult Drosophila Following Radiation Exposure During Larval Development
Source: PubMed Central journal article supplement (PMC4632050; doi:10.1534/g3.115.021782), 2015-09-01
Supplement: supp_g3.115.021782_TableS1.pdf [file supp_g3.115.021782_TableS1.pdf]

**Table S1. Primers used for qRT-PCR**

| Primers used for qRT-PCR | 5' -> 3'                  |
|--------------------------|---------------------------|
| Rp49 Forward             | GACGCTTCAAGGGACAGTATCTG   |
| Rp49 Reverse             | AAACGCGGTTCTGCATGAG       |
|                          |                           |
| Drosomylin (Drs) Fw      | CGTGAGAACCTTTTCCAATATGATG |
| Drosomylin (Drs) Rv      | TCCCAGGACCACCAGCAT        |
|                          |                           |
| Drosocin (DroA) Fw       | CACCCATGGCAAAAACGC        |
| Drosocin (DroA) Rv       | TGAAGTTCACCATCGTTTTCTG    |
|                          |                           |
| Diptericin (Dipt) Fw     | GCTGCGCAATCGCTTCTACT      |
| Diptericin (Dipt) Rv     | TGGTGGAGTGGGCTTCATG       |
|                          |                           |
| Attacin (AttC) Fw        | TGGGCTACAACAATCATGGA      |
| Attacin (AttC) Rv        | GCGTATGGGTTTTGGTCAGT      |
|                          |                           |
| Cecropin (Cec) Fw        | ACGCGTTGGTCAGCACACT       |
| Cecropin (Cec) Rv        | ACATTGGCGGCTTGTTGAG       |
|                          |                           |
| Metchnikowin (Mtk) Fw    | CGTCACCAGGGACCCATTT       |
| Metchnikowin (Mtk) Rv    | CCGGTCTTGTTGGTTAGGA       |
