# Supplementary material for: Persistent Activation of the Innate Immune Response in Adult Drosophila Following Radiation Exposure During Larval Development
Source: PubMed Central journal article supplement (PMC4632050; doi:10.1534/g3.115.021782), 2015-09-01
Supplement: supp_g3.115.021782_TableS2.pdf [file supp_g3.115.021782_TableS2.pdf]

**Table S2. AMP expression in pupae 5 hours after irradiation**

|       | Drs       | DroA      | Dipt      | AttC      | Cec       | Mtk       |
|-------|-----------|-----------|-----------|-----------|-----------|-----------|
| 10 Gy | 1.5 ± 0.9 | 0.7 ± 0.5 | 0.8 ± 0.6 | 0.7 ± 0.3 | 0.6 ± 0.1 | 1.1 ± 0.8 |
| 20 Gy | 1.3 ± 0.4 | 0.4 ± 0.2 | 0.4 ± 0.1 | 0.6 ± 0.1 | 0.6 ± 0.1 | 0.5 ± 0.2 |
| 30 Gy | 1.2 ± 0.5 | 0.6 ± 0.3 | 0.6 ± 0.3 | 0.9 ± 0.5 | 1.1 ± 0.9 | 0.9 ± 0.6 |
| 40 Gy | 0.8 ± 0.3 | 0.5 ± 0.2 | 1.2 ± 0.4 | 0.8 ± 0.2 | 0.3 ± 0.1 | 1.2 ± 0.5 |

**Table S2. The innate immune response is not activated in pupae 4 hours after irradiating late third instar larvae.** Late third instar larvae were irradiated at the indicated doses and mRNA levels for six different AMPs were quantified in whole pupae 4-4.5 hours after irradiation. Wild-type Canton-S male and female larvae were used for these experiments. Values are given as mean expression of each AMP RNA (2-4 trials each) normalized to mean expression of the corresponding RNA in non-irradiated, age-matched controls (fold induction) ± SEM. Rp49 was used as the reference gene. See Table S1 for primers used.
